# Supplementary material
Source: Springer Nature journal article supplement (https://www.springermedizin.de/resource/supplementary/12885_2011_2968_MOESM5_ESM.pdf/9462414)

## Bcl-2

## Bcl-XL

HeLa

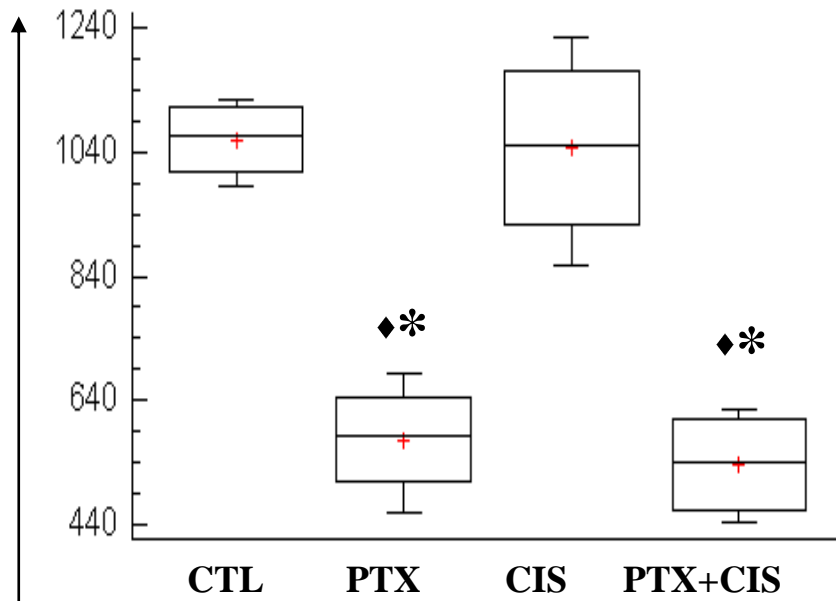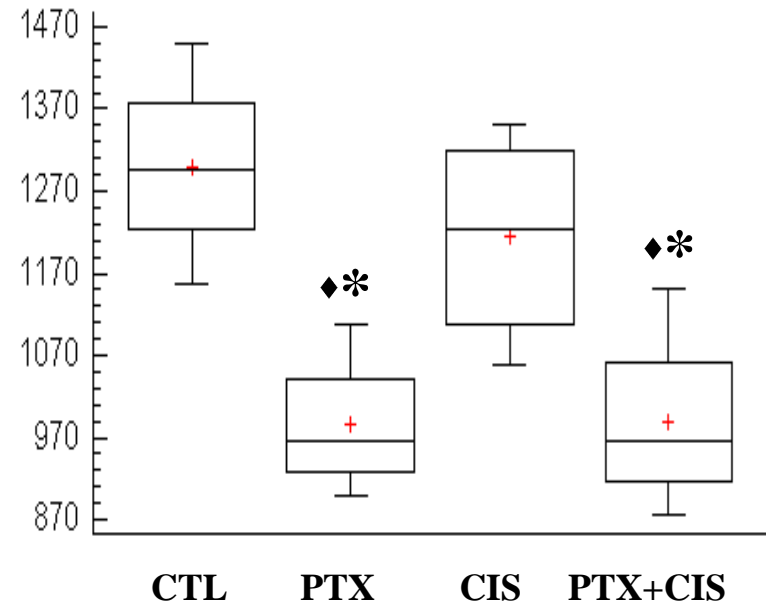

SiHa

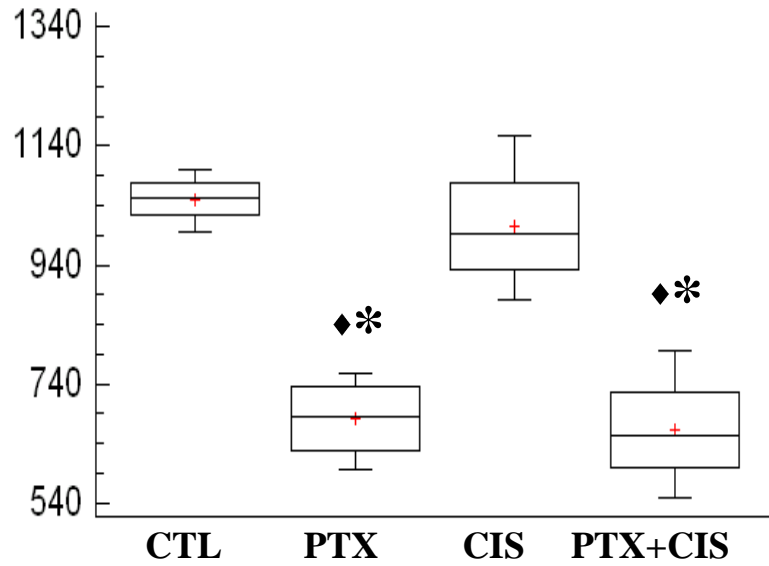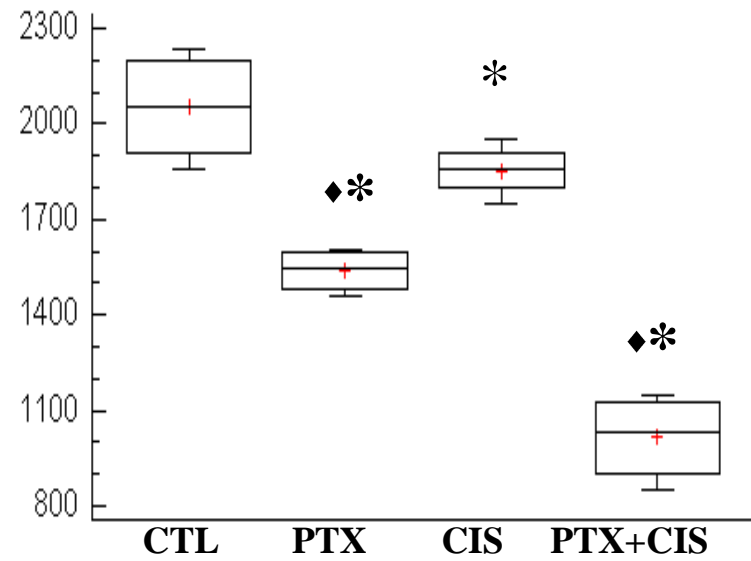

Supplement: MOESM5 [file 9462414]
